# Supplementary material
Source: PubMed Central journal article supplement (PMC6980696)
Supplement: NIHMS1540625-supplement-1.pdf [file NIHMS1540625-supplement-1.pdf]

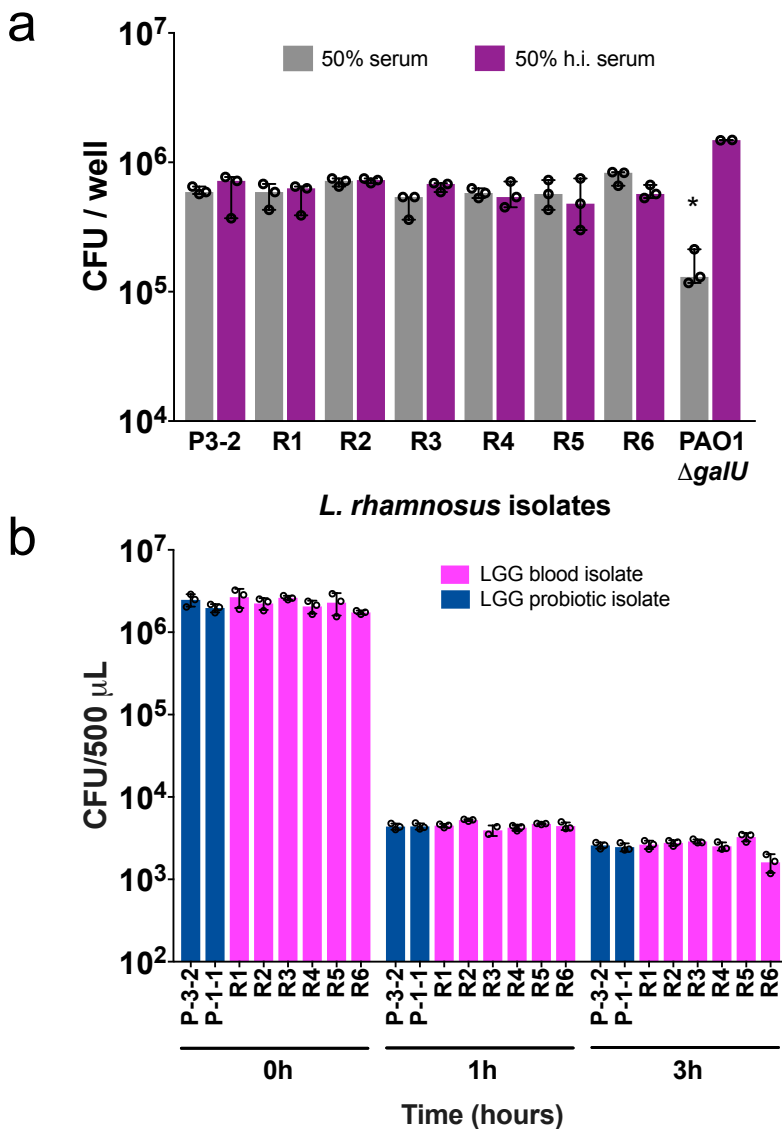

**Supplementary Figure 1.** Bacterial survival in human serum and whole blood are similar among the probiotic and blood isolates. (a) Survival in human serum of *L. rhamnosus* GG probiotic control strain without SNPs (P3-2) and blood *L. rhamnosus* isolates (R1-R6). The concentrations of serum tested were 50% vs. 50% heat-inactivated (h.i.). The bars show the medians. Error bars indicate interquartile ranges. \* $P = 0.0448$  for 50% serum vs. 50% h.i. serum by Kruskal-Wallis test followed by Dunn's multiple comparisons test. Results shown are representative of 2 independent experiments. PAO1  $\Delta galU$  is a *Pseudomonas aeruginosa galU* mutant, an LPS-rough, serum-sensitive strain (positive control). (b) Survival in human whole blood of probiotic strains without SNPs (P3-2) or with the CcmA SNP (P1-1), and blood isolates (R1-R6). The bars show the means of 3 technical replicates. Error bars indicate SD.  $P = 0.1893$  ( $t_{1h}/t_{0h}$ ) and  $P = 0.1901$  ( $t_{3h}/t_{0h}$ ) by ANOVA test followed by Dunnett's multiple comparison test of survival indices at 1 and 3 hours compared to time 0, using the probiotic P3-2 as control. Results shown are representative of 2 independent experiments performed on different days using blood from two different donors. Px-y where x = probiotic batch number and y = isolate number.

**Supplementary Table 1a. All cases of *Lactobacillus* bacteremia identified in ICU patients during the 5-year study period.**

| Case | Consecutive days receiving probiotic prior to bacteremia | Route of probiotic admin. | Age (y) | Hospital location at time of bacteremia | Year of bacteremia | Chronic conditions                         | <i>Lactobacillus</i> species by MALDI-TOF | <i>Lactobacillus rhamnosus</i> strain by WGS* |
|------|----------------------------------------------------------|---------------------------|---------|-----------------------------------------|--------------------|--------------------------------------------|-------------------------------------------|-----------------------------------------------|
| R1   | 89                                                       | Nasojejunal               | 2       | ICP                                     | 2011               | Mitochondrial disorder                     | <i>rhamnosus</i>                          | LGG                                           |
| R2   | Home medication                                          | Jejunostomy               | 4       | ICP                                     | 2012               | Mitochondrial disorder                     | <i>rhamnosus</i>                          | LGG                                           |
| R3   | 4                                                        | Gastrostomy               | 12      | Medical/Surgical ICU                    | 2012               | Cerebral palsy                             | <i>rhamnosus</i>                          | LGG                                           |
| R4   | 12                                                       | Jejunostomy               | 1       | Cardiac ICU                             | 2013               | Congenital heart disease                   | <i>rhamnosus</i>                          | LGG                                           |
| R5   | 118                                                      | Gastrostomy               | 19      | Medical ICU                             | 2014               | Cystic fibrosis                            | <i>rhamnosus</i>                          | LGG                                           |
| R6   | 13                                                       | Gastrostomy               | 19      | Medical/Surgical ICU                    | 2014               | Cystic fibrosis                            | <i>rhamnosus</i>                          | LGG                                           |
| N1   | Not receiving probiotics                                 |                           | 16      | Medical/Surgical ICU                    | 2010               | 22q11 deletion, VCFS, s/p dental procedure | <i>acidophilus</i>                        |                                               |
| N2   | Not receiving probiotics                                 |                           | 0.5     | Medical ICU                             | 2010               | s/p BMT, GVHD                              | <i>plantarum</i>                          |                                               |

Abbreviations: ICP, intermediate care program; BMT, bone marrow transplant; GVHD, graft-versus-host disease; SBS, short bowel syndrome; FTT, failure to thrive; PN, parenteral nutrition; VCFS, velocardiofacial syndrome. \*See Fig. 1a.

**Supplementary Table 1b. All cases of *Lactobacillus* bacteremia identified in non-ICU patients during the 5-year study period.**

| Case | Consecutive days receiving probiotic prior to bacteremia | Route of probiotic admin. | Age (y) | Hospital location at time of bacteremia | Year of bacteremia | Chronic conditions | <i>Lactobacillus</i> species by MALDI-TOF | <i>Lactobacillus rhamnosus</i> strain by WGS* |
|------|----------------------------------------------------------|---------------------------|---------|-----------------------------------------|--------------------|--------------------|-------------------------------------------|-----------------------------------------------|
| N3   | Not receiving probiotics                                 |                           | 18      | BMT unit                                | 2009               | BMT, GVHD          | <i>casei</i>                              |                                               |
| N4   | Not receiving probiotics                                 |                           | 1       | Inpatient floor                         | 2009               | SBS, on PN         | <i>plantarum</i>                          |                                               |
| N5   | Not receiving probiotics                                 |                           | 1       | Inpatient floor                         | 2009               | Cerebral Palsy     | <i>rhamnosus</i>                          | CP006804                                      |
| N6   | Not receiving probiotics                                 |                           | 0.4     | Inpatient floor                         | 2009               | Prematurity, SBS   | Unknown, isolate not available            |                                               |
| N7   | Not receiving probiotics                                 |                           | 3       | Inpatient floor                         | 2010               | Retinoblastoma     | <i>gasseri</i>                            |                                               |
| N8   | Not receiving probiotics                                 |                           | 1       | Emergency Department                    | 2011               | SBS, on PN         | No ID by MALDI-TOF                        |                                               |
| N9   | Not receiving probiotics                                 |                           | 0.7     | Outpatient surgery clinic               | 2011               | SBS, on PN         | <i>rhamnosus</i>                          | CP006804                                      |
| N10  | Not receiving probiotics                                 |                           | 7       | BMT unit                                | 2012               | s/p BMT            | <i>rhamnosus</i>                          | CP005485                                      |
| N11  | Not receiving probiotics                                 |                           | 0.6     | Inpatient floor                         | 2013               | FTT, on PN         | <i>rhamnosus</i>                          | CP006804                                      |
| N12  | Not receiving probiotics                                 |                           | 0.8     | Inpatient floor                         | 2013               | SBS, on PN         | <i>plantarum</i>                          |                                               |

Abbreviations: BMT, bone marrow transplant; GVHD, graft-versus-host disease; SBS, short bowel syndrome; FTT, failure to thrive; PN, parenteral nutrition. \*See Fig. 1a.

**Supplementary Table 5. Mutations unique to blood isolates of *Lactobacillus rhamnosus*.**

| <b>Case</b> | <b>Gene ID</b>                  | <b>Type of mutation</b> | <b>Protein ID</b>                                 | <b>AA position</b> | <b>Associated pathway</b> |
|-------------|---------------------------------|-------------------------|---------------------------------------------------|--------------------|---------------------------|
| R1          | <i>rpoB</i>                     | Non-synonymous          | DNA directed RNA polymerase $\beta$ -subunit      | H487D              | DNA transcription         |
| R2          | <i>pgm</i>                      | Synonymous              | Phosphoglucomutase                                | V132               | Pentose phosphate pathway |
| R2          | <i>trxB</i><br><><br><i>pgm</i> | Intergenic              | Thioredoxin reductase<br><><br>Phosphoglucomutase |                    |                           |
| R3          | <i>yhfS</i>                     | Synonymous              | Putative acetyl-CoA C-acetyltransferase           | G44                |                           |
| R6          | <i>rbsK</i>                     | Non-synonymous          | Ribokinase                                        | A259D              | Pentose phosphate pathway |
